# Supplementary material
Source: PubMed Central journal article supplement (PMC6391039)
Supplement: nl8b04862_si_001.pdf [file nl8b04862_si_001.pdf]

# Supporting information: High-Frequency Stochastic Switching of Graphene Resonators Near Room Temperature

Robin J. Dolleman,<sup>†,¶</sup> Pierpaolo Belardinelli,<sup>‡</sup> Samer Hourii,<sup>†,§</sup> Herre S.J. van der  
Zant,<sup>†</sup> Farbod Alijani,<sup>‡</sup> and Peter G. Steeneken<sup>\*,†</sup>

*Kavli Institute of Nanoscience, Delft University of Technology, Lorentzweg 1, 2628 CJ,  
Delft, The Netherlands, and Department of Precision and Microsystems Engineering, Delft  
University of Technology, Mekelweg 2, 2628 CD, Delft, The Netherlands*

E-mail: P.G.Steeneken@tudelft.nl

## S1: Equations of motion

The dimensionless equation that governs the dynamics of the drum is

$$\ddot{x} + 2\zeta\dot{x} + x + \alpha x^3 = \lambda \cos \omega_F t. \quad (1)$$

In our formulation the displacement of the membrane's center  $q$  is normalized with respect to the membrane radius  $R$ , i.e.  $x = q/R$ . The time variable  $\tau$  is made dimensionless by making

---

\*To whom correspondence should be addressed

<sup>†</sup>Kavli Institute of Nanoscience, Delft University of Technology, Lorentzweg 1, 2628 CJ, Delft, The Netherlands

<sup>‡</sup>Department of Precision and Microsystems Engineering, Delft University of Technology, Mekelweg 2, 2628 CD, Delft, The Netherlands

<sup>¶</sup>Current affiliation: 2nd Institute of Physics, RWTH Aachen University, 52074 Aachen, Germany

<sup>§</sup>Current affiliation: NTT Basic Research Laboratories, NTT Corporation, 3-1, Morinosato Wakamiya, Atsugi, Kanagawa, 243-0198, Japan

use of the resonant frequency  $\omega$ . The overdot in eq. (1) means differentiation with respect to the dimensionless time  $t = \omega\tau$ . The amplitude and frequency of the excitation are  $f$  and  $\Omega_F$ , related to their dimensionless counterparts  $\lambda = f/(R\omega^2 m_{\text{eff}})$  and  $\omega_F = \Omega_F/\omega$ , respectively. The symbol  $m_{\text{eff}}$  indicates the effective mass of the drum. The membrane damping  $c$  is scaled to the dimensionless damping ratio  $2\zeta = c/(\omega m_{\text{eff}})$ . Finally,  $\alpha = R^2 k_3/(\omega^2 m_{\text{eff}})$  is the dimensionless conjugate of the cubic stiffness coefficient  $k_3$ .

In order to analyze the slow dynamical evolution of the system, the solution is assumed to have the form

$$x(t) = P(t) \cos \omega_F t + Q(t) \sin \omega_F t, \quad (2)$$

in which  $P(t)$  and  $Q(t)$  are slowly varying functions of time representing the real and imaginary part coefficients of the solution. This can be realized by expressing the dimensionless displacement of the membrane  $x(t)$  in complex functions  $u_1(t)$ ,  $u_2(t)$  with  $u_2(t)$  complex conjugate of  $u_1(t)$ :<sup>1</sup>

$$x = u_1 \exp^{i\omega_F t} + u_2 \exp^{-i\omega_F t}. \quad (3)$$

By exploiting Euler's formula and dividing real and imaginary parts we recast eq. 2 to  $P = (u_1 + u_2)$  and  $Q = i(u_1 - u_2)$  which are the real and imaginary part coefficients, respectively.

Following the method of variation of parameters, the solution is subject to the condition:<sup>2</sup>

$$\dot{P}(t) \cos \omega_F t + \dot{Q}(t) \sin \omega_F t = 0. \quad (4)$$

By substituting eq. 2 with its corresponding time derivatives into eq. 1, and making use of eq. 4, we obtain:

$$\begin{cases} \dot{P} = \frac{\omega^2 - \omega_F^2}{2\omega_F} Q - \zeta P + \frac{3}{8} \frac{\alpha}{\omega_F} Q (P^2 + Q^2) \\ \dot{Q} = -\frac{\omega^2 - \omega_F^2}{2\omega_F} P - \zeta Q - \frac{3}{8} \frac{\alpha}{\omega_F} P (P^2 + Q^2) + \frac{\lambda}{2\omega_F}. \end{cases} \quad (5)$$

The deterministic system of eqs. (5) is then perturbed by two independent Gaussian white noise processes with equal intensity  $\sigma$  in the equations for  $\dot{P}$  and  $\dot{Q}$ , respectively. The system of stochastic differential equations (SDE) with additive noise is:

$$\begin{cases} dP = \left( \frac{\omega^2 - \omega_F^2}{2\omega_F} Q - \zeta P + \frac{3}{8} \frac{\alpha}{\omega_F} Q (P^2 + Q^2) \right) dt + \sigma dW_1 \\ dQ = \left( -\frac{\omega^2 - \omega_F^2}{2\omega_F} P - \zeta Q - \frac{3}{8} \frac{\alpha}{\omega_F} P (P^2 + Q^2) + \frac{\lambda}{2\omega_F} \right) dt + \sigma dW_2 \end{cases} \quad (6)$$

in which  $W_1(t)$  and  $W_2(t)$  are independent Wiener processes, normally distributed random variables with mean zero and variance  $dt$ . Note that neither  $W$  nor the state variables  $P$  and  $Q$  are anywhere differentiable now that the system is converted to a set of stochastic differential equations. For the integration of eq. 6, the Itô scheme will be employed.<sup>3</sup>

## References

- (1) Dykman, M.; Krivoglaz, M. Theory of Fluctuational Transitions Between Stable States of a Nonlinear Oscillator. *Sov. Phys. JETP* **1979**, *50*, 30–37.
- (2) Kryloff, N.; Bogoliubov, N.; Lefschetz, S. *Introduction to Non-linear Mechanics*; Annals of Mathematics Studies; Princeton University Press, 1947.
- (3) Oksendal, B. *Stochastic Differential Equations: An Introduction with Applications*; Universitext; Springer Berlin Heidelberg, 2013.
